# Supplementary material
Source: publisher figshare collection journal article supplement (https://sage.figshare.com/ndownloader/files/12419708)
Supplement: Supplementary file 1 [file 12419708]

## Appendix

### Table of Contents

Figure S1a Rate ratios of physician visits by ICD chapter between cases and controls in the 5 years before the first demyelinating claim

Figure S1b Rate ratios of physician visits by ICD chapter between cases and controls in the 5 years before MS symptom onset

Figure S1c Rate ratios of hospitalizations by ICD chapter between cases and controls in the 5 years before the first demyelinating claim

Figure S1d Rate ratios of hospitalizations by ICD chapter between cases and controls in the 5 years before MS symptom onset

Figure S1e Rate ratios of physician visits by physician specialty between cases and controls in the 5 years before the first demyelinating claim

Figure S1f Rate ratios of physician visits by physician specialty between cases and controls in the 5 years before MS symptom onset

Figure S1g Proportional differences between cases and controls by drug class (ATC level 1) in the 5 years before the first demyelinating claim

Figure S1h Proportional differences between cases and controls by drug class (ATC level 1) in the 5 years before MS symptom onset

Table S1. Data availability within each of the four Canadian provinces

Table S2. Multiple sclerosis specific and demyelinating disease related codes used for identifying people with MS and the respective index date (i.e., first recorded demyelinating event)

Table S3a Study outcomes: diagnostic codes for the ICD chapters

Table S3b Study outcomes: drug classes based on the Anatomical Therapeutic Chemical Classification System, Level 1

Table S3c Study outcomes: physician specialty

Table S3d Study outcomes: algorithms used to identify morbidities

Table S4a Characteristics of the health administrative cohorts by province at the index date

Table S4b Characteristics of the MS Clinic-derived cohorts by province at the index date

Table S5 Five years before the first demyelinating claim or MS symptom onset: rate ratios for physician and hospital encounters by ICD chapter, comparing MS cases and controls

Table S6 Five years before the first demyelinating claim or MS symptom onset: rate ratios of physician encounters by physician specialty, comparing MS cases and controls

Table S7 Five years before the first demyelinating claim or MS symptom onset: proportion with a least one prescription by ATC level 1

Table S8 Prevalence of morbidities during the five years before the first demyelinating claim or MS symptom onset

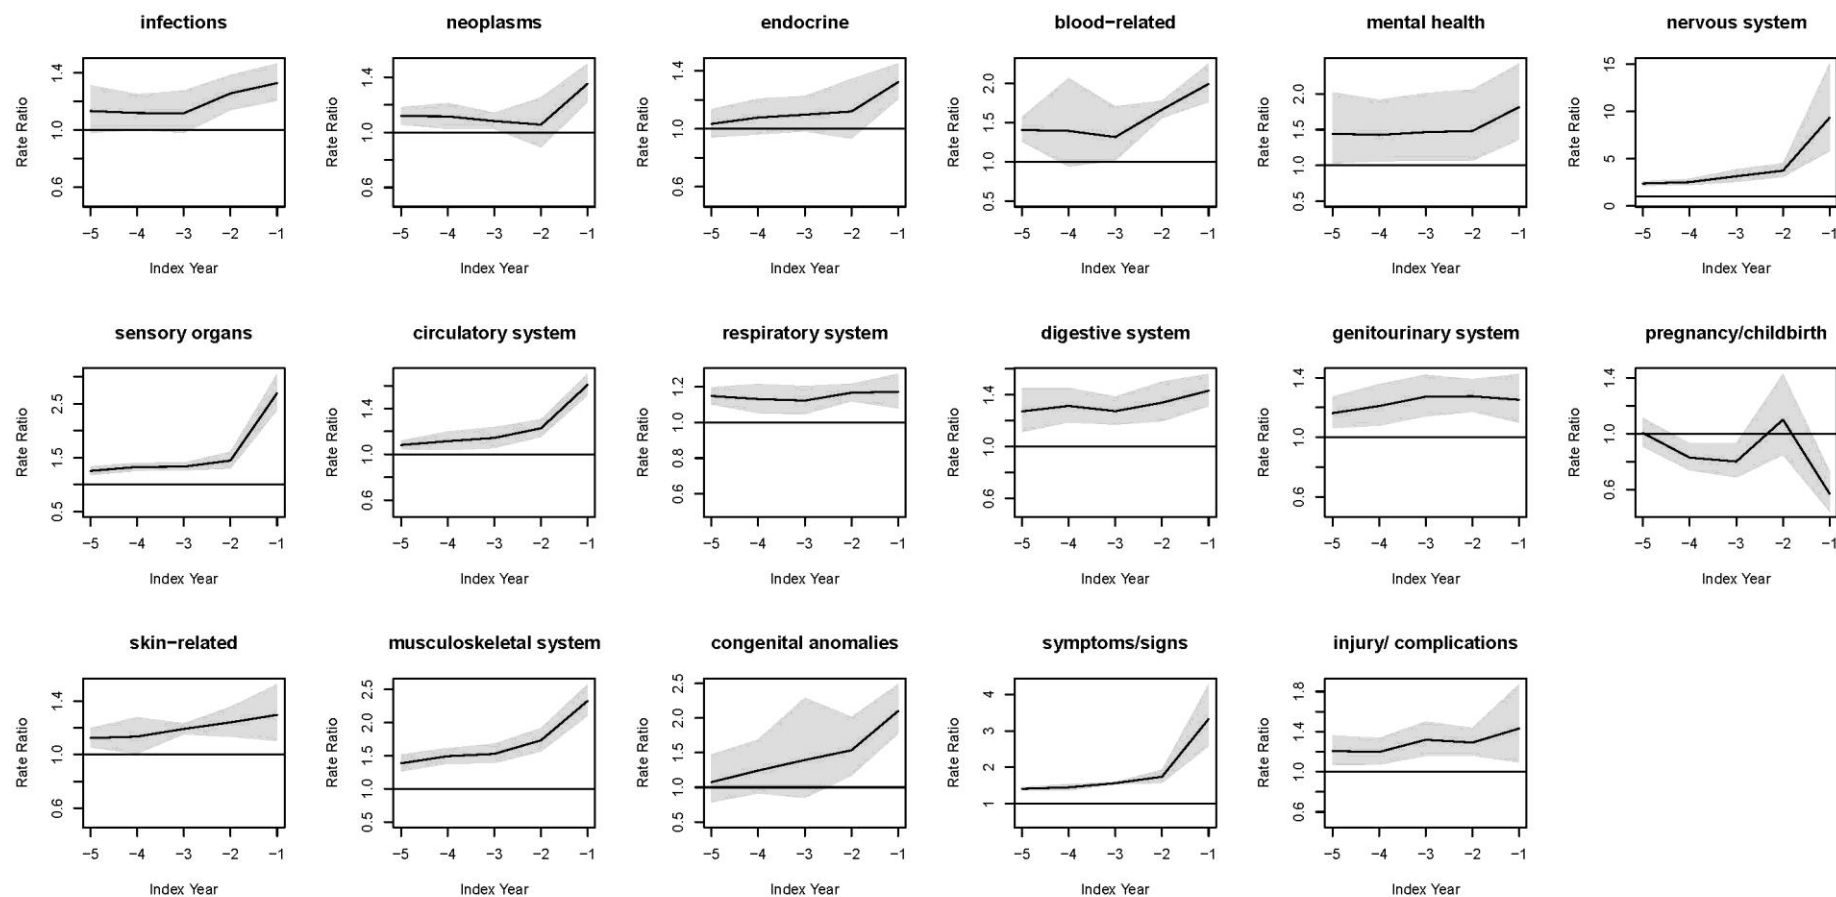

**Figure S1a Rate ratios of physician visits by ICD chapter between cases and controls in the 5 years before the first demyelinating claim**

The x-axis represents the five-year prodromal period in years before the index date, e.g., ‘-5’ indicates the fifth year and ‘-1’ indicates the one year prior to the index date. The y-axis shows the rate ratios (RR) and the shaded area indicates the corresponding 95% confidence intervals; an  $RR > 1$  indicates increased health service utilization in the cases relative to the matched controls.

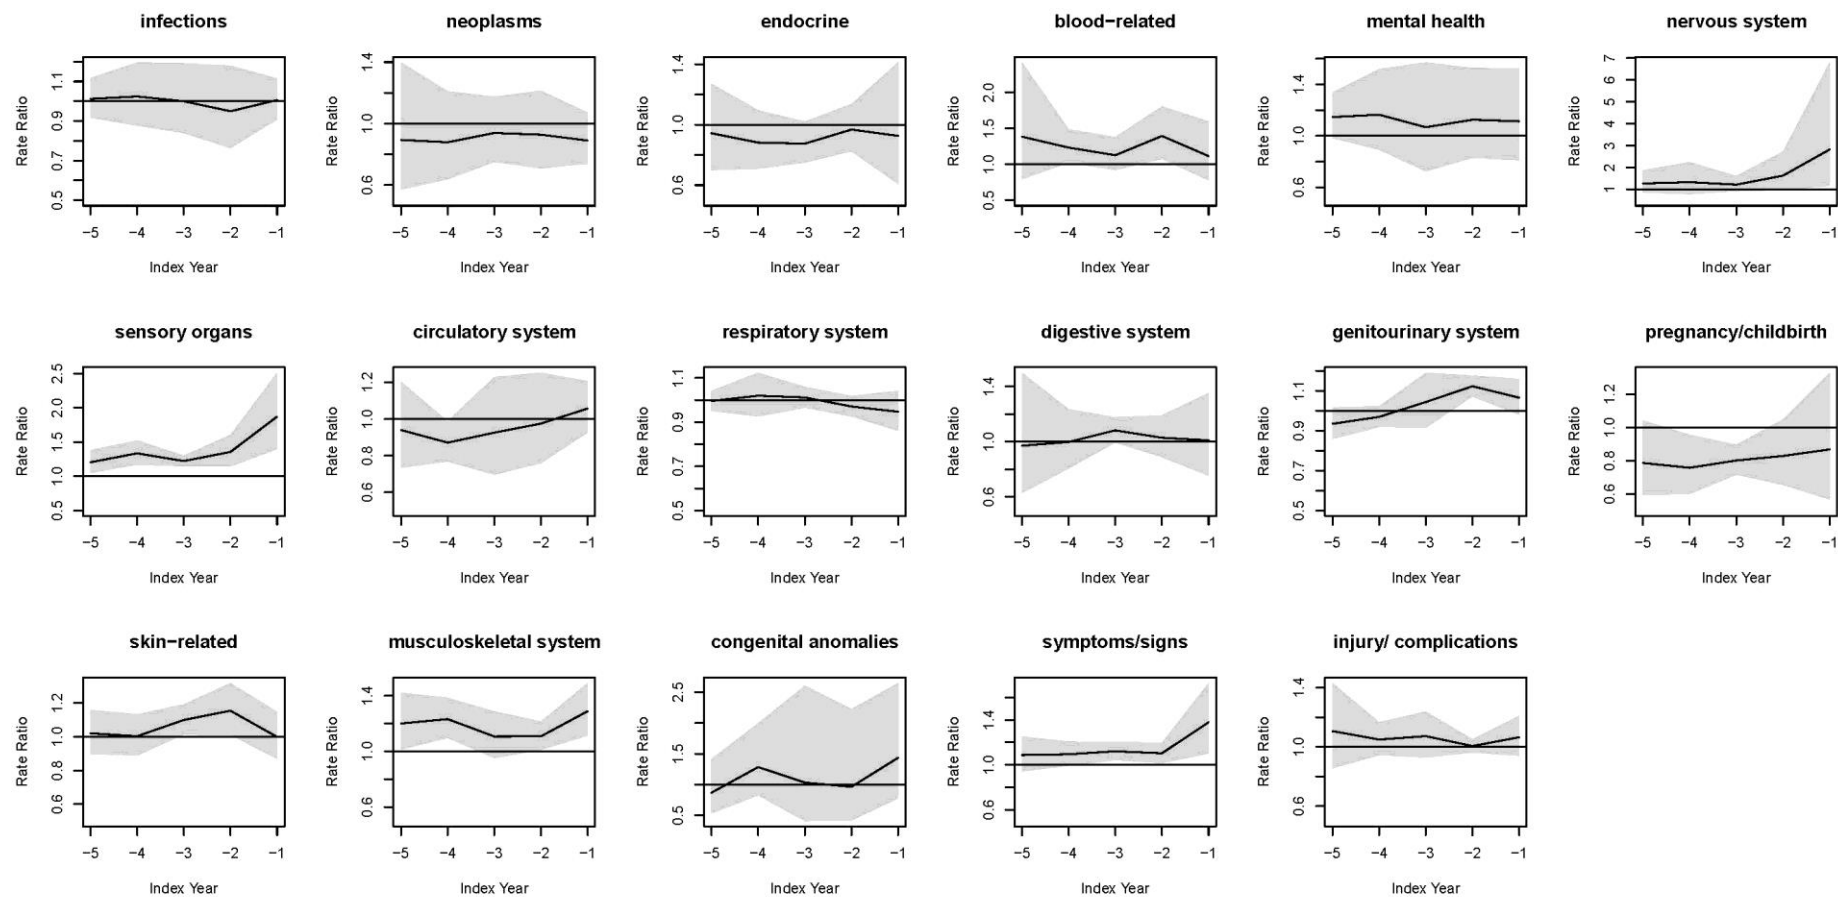

**Figure S1b Rate ratios of physician visits by ICD chapter between cases and controls in the 5 years before MS symptom onset**

The x-axis represents the five-year prodromal period in years before the index date, e.g., ‘-5’ indicates the fifth year and ‘-1’ indicates the one year prior to the index date. The y-axis shows the rate ratios (RR) and the shaded area indicates the corresponding 95% confidence intervals; an  $RR > 1$  indicates increased health service utilization in the cases relative to the matched controls.

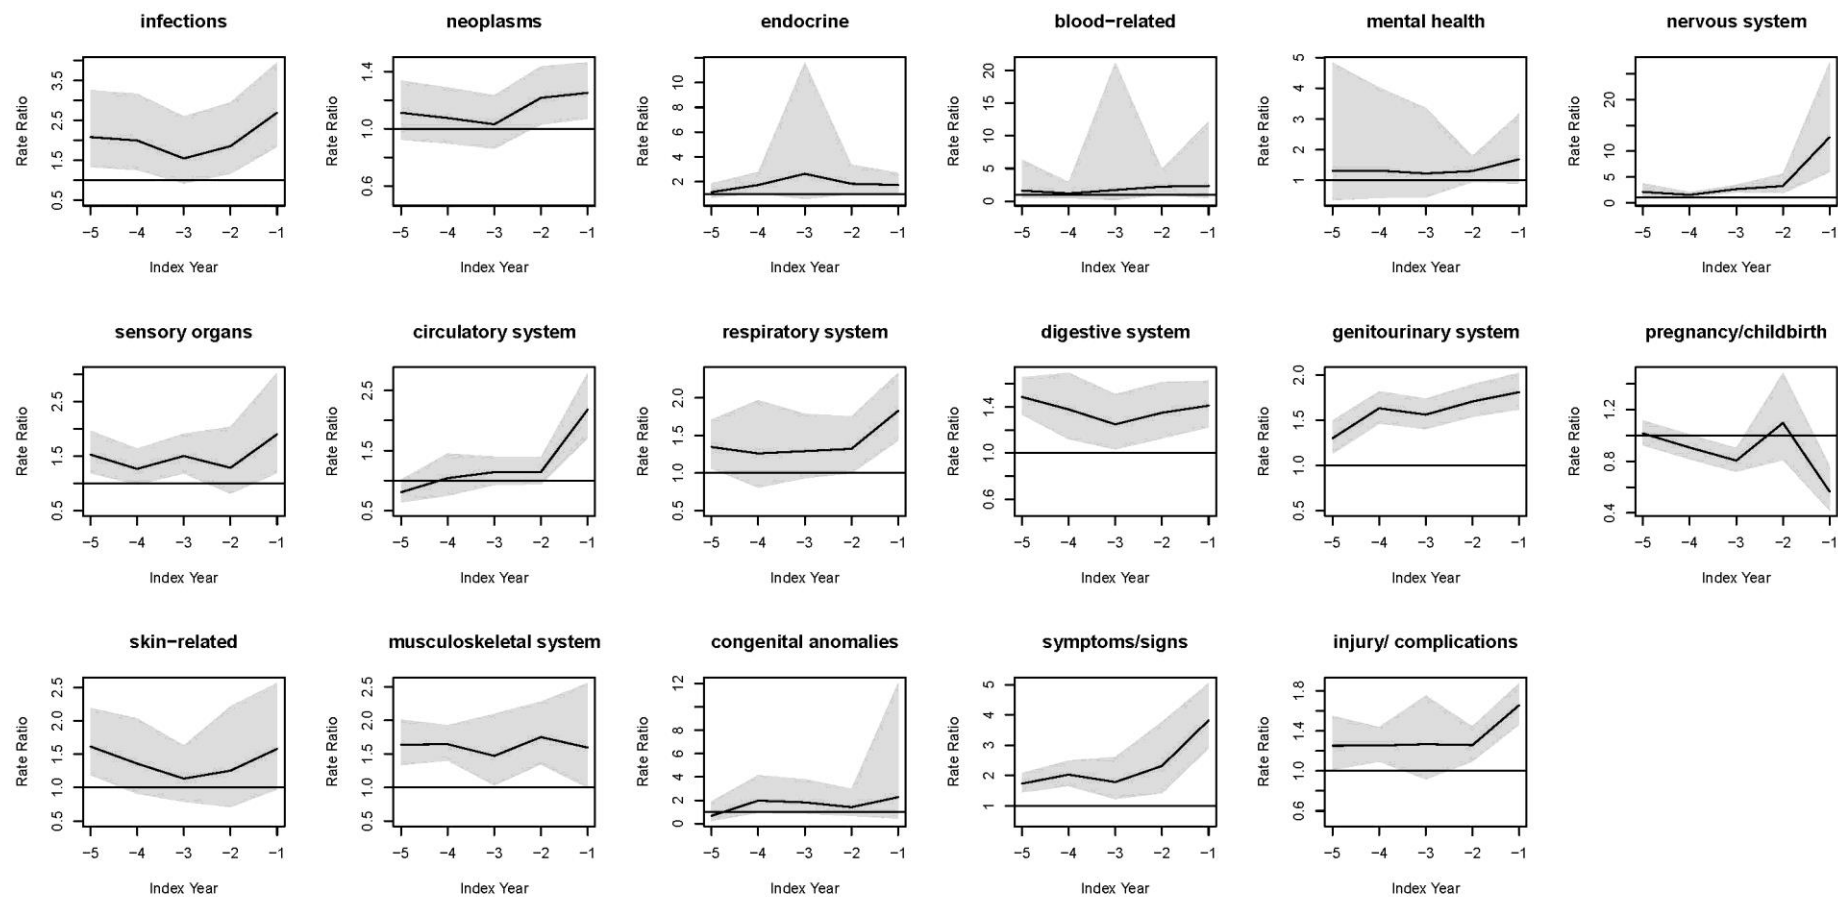

**Figure S1c Rate ratios of hospitalizations by ICD chapter between cases and controls in the 5 years before the first demyelinating claim**

The x-axis represents the five-year prodromal period in years before the index date, e.g., ‘-5’ indicates the fifth year and ‘-1’ indicates the one year prior to the index date. The y-axis shows the rate ratios (RR) and the shaded area indicates the corresponding 95% confidence intervals; an  $RR > 1$  indicates increased health service utilization in the cases relative to the matched controls.

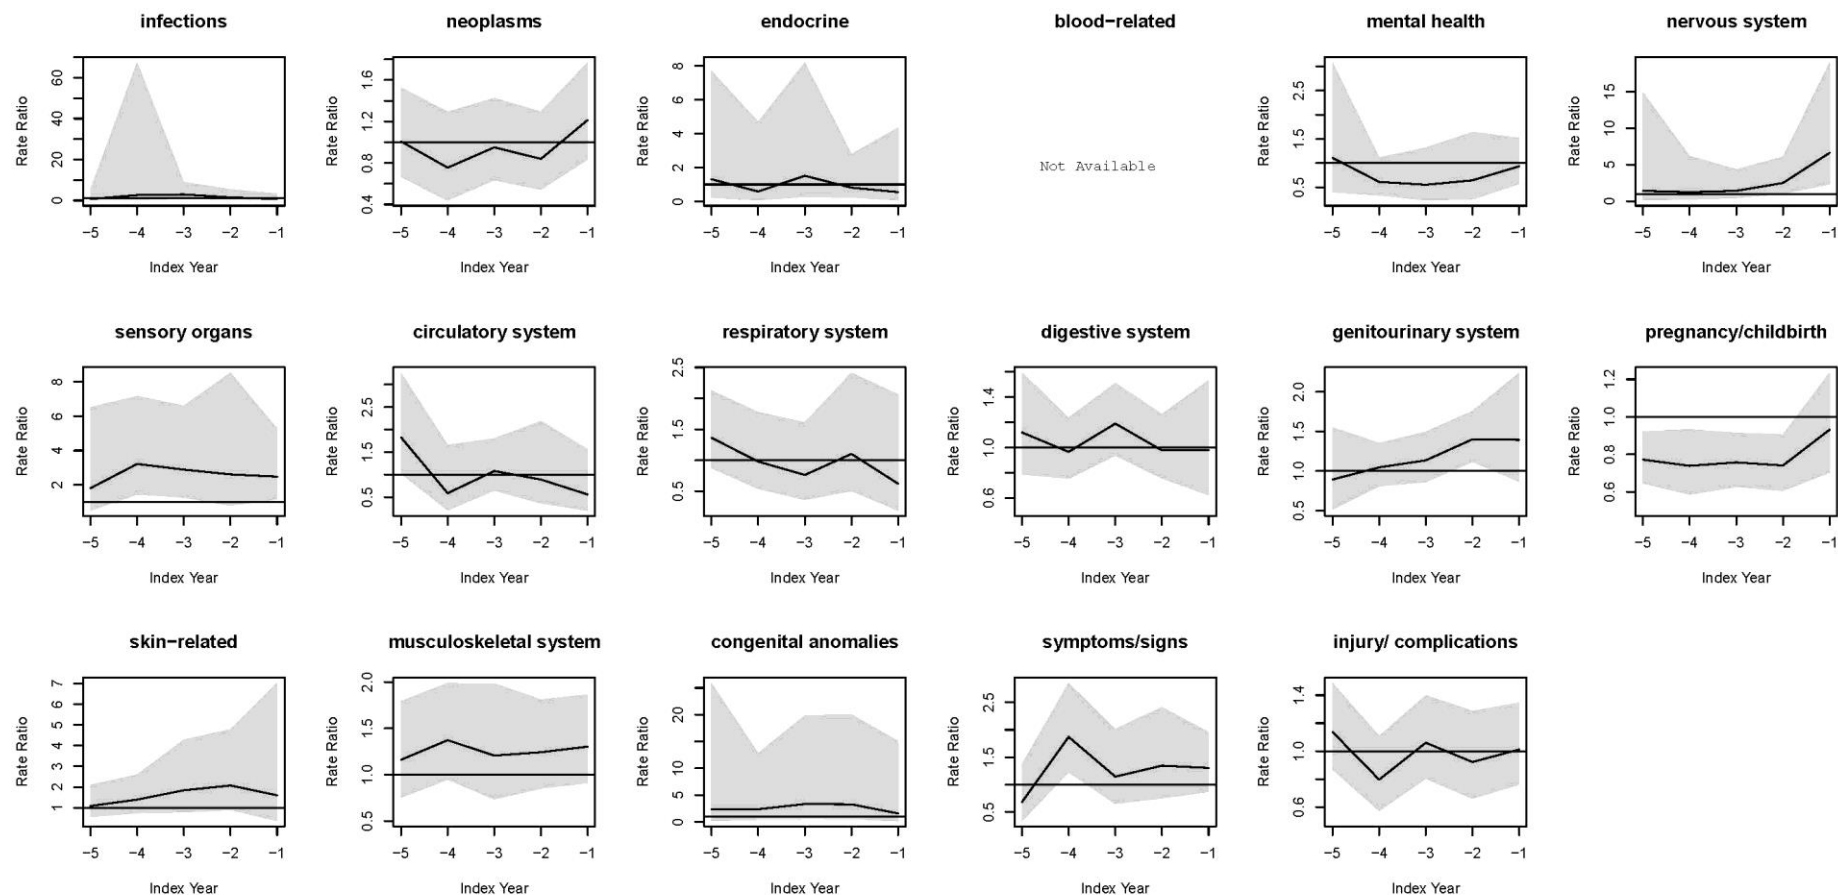

**Figure S1d Rate ratios of hospitalizations by ICD chapter between cases and controls in the 5 years before MS symptom onset**

The x-axis represents the five-year prodromal period in years before the index date, e.g., ‘-5’ indicates the fifth year and ‘-1’ indicates the one year prior to the index date. The y-axis shows the rate ratios (RR) and the shaded area indicates the corresponding 95% confidence intervals; an  $RR > 1$  indicates increased health service utilization in the cases relative to the matched controls. Due to privacy regulations, and as required by the data custodians, graphs were too few individuals were represented were not shown (e.g. the ICD chapter for ‘blood-related’ conditions could not be shown)

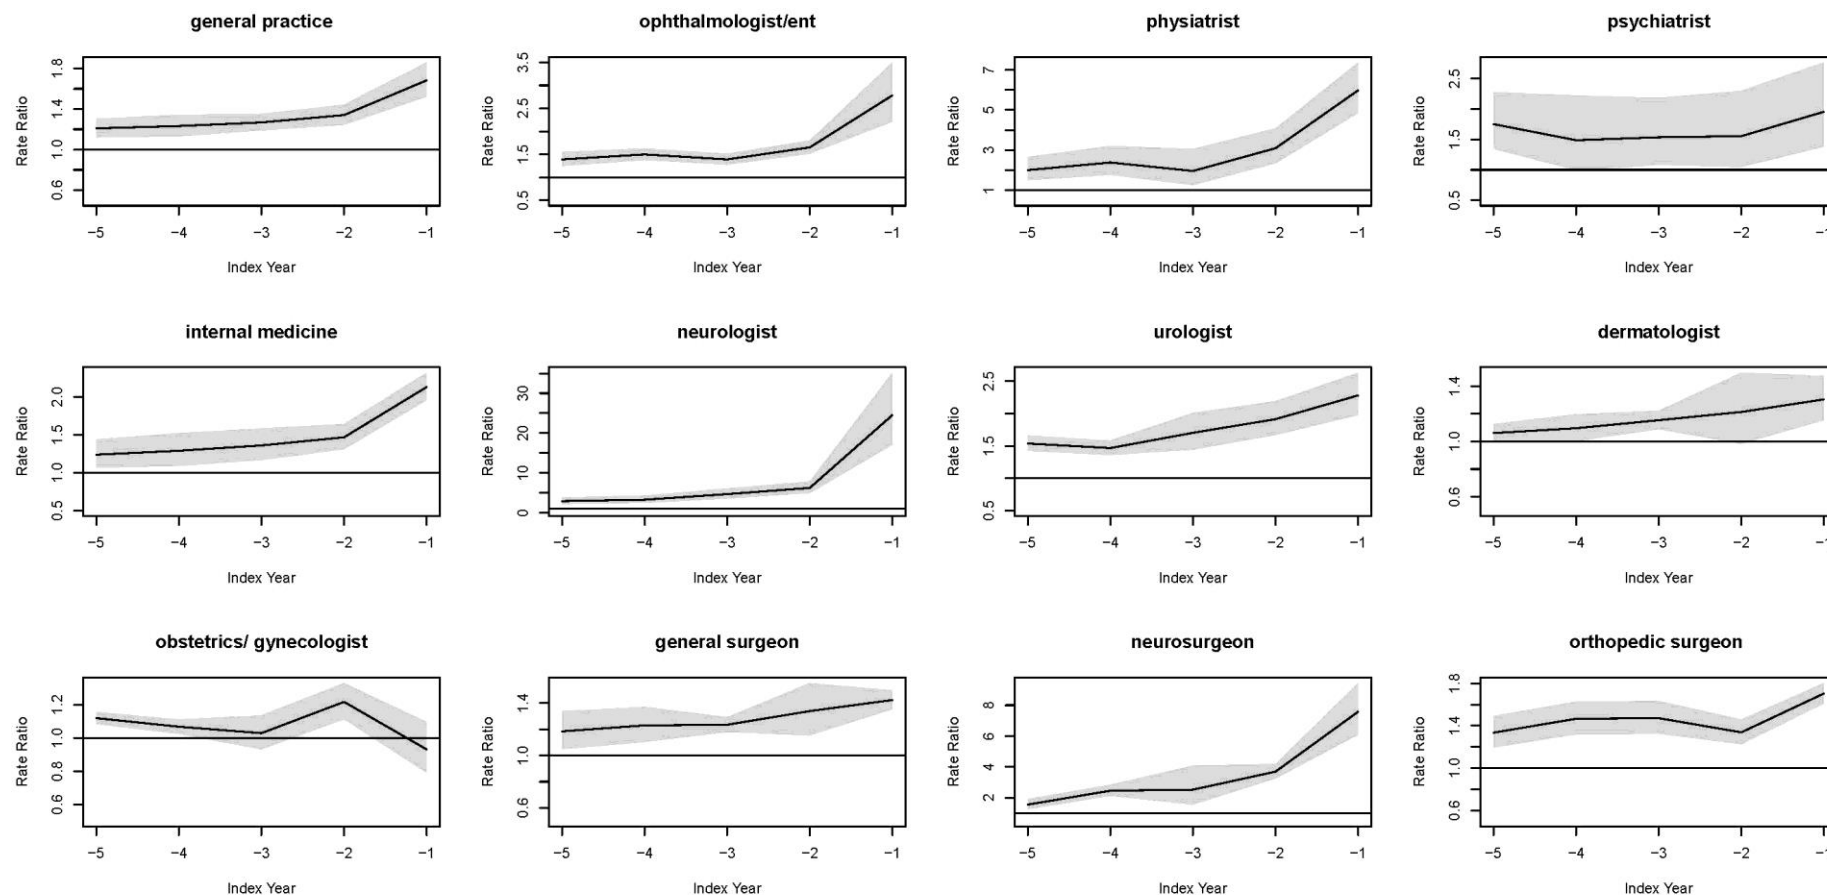

**Figure S1e Rate ratios of physician visits by physician specialty between cases and controls in the 5 years before the first demyelinating claim**

The x-axis represents the five-year prodromal period in years before the index date, e.g., ‘-5’ indicates the fifth year and ‘-1’ indicates the one year prior to the index date. The y-axis shows the rate ratios (RR) and the shaded area indicates the corresponding 95% confidence intervals; an  $RR > 1$  indicates increased health service utilization in the cases relative to the matched controls.

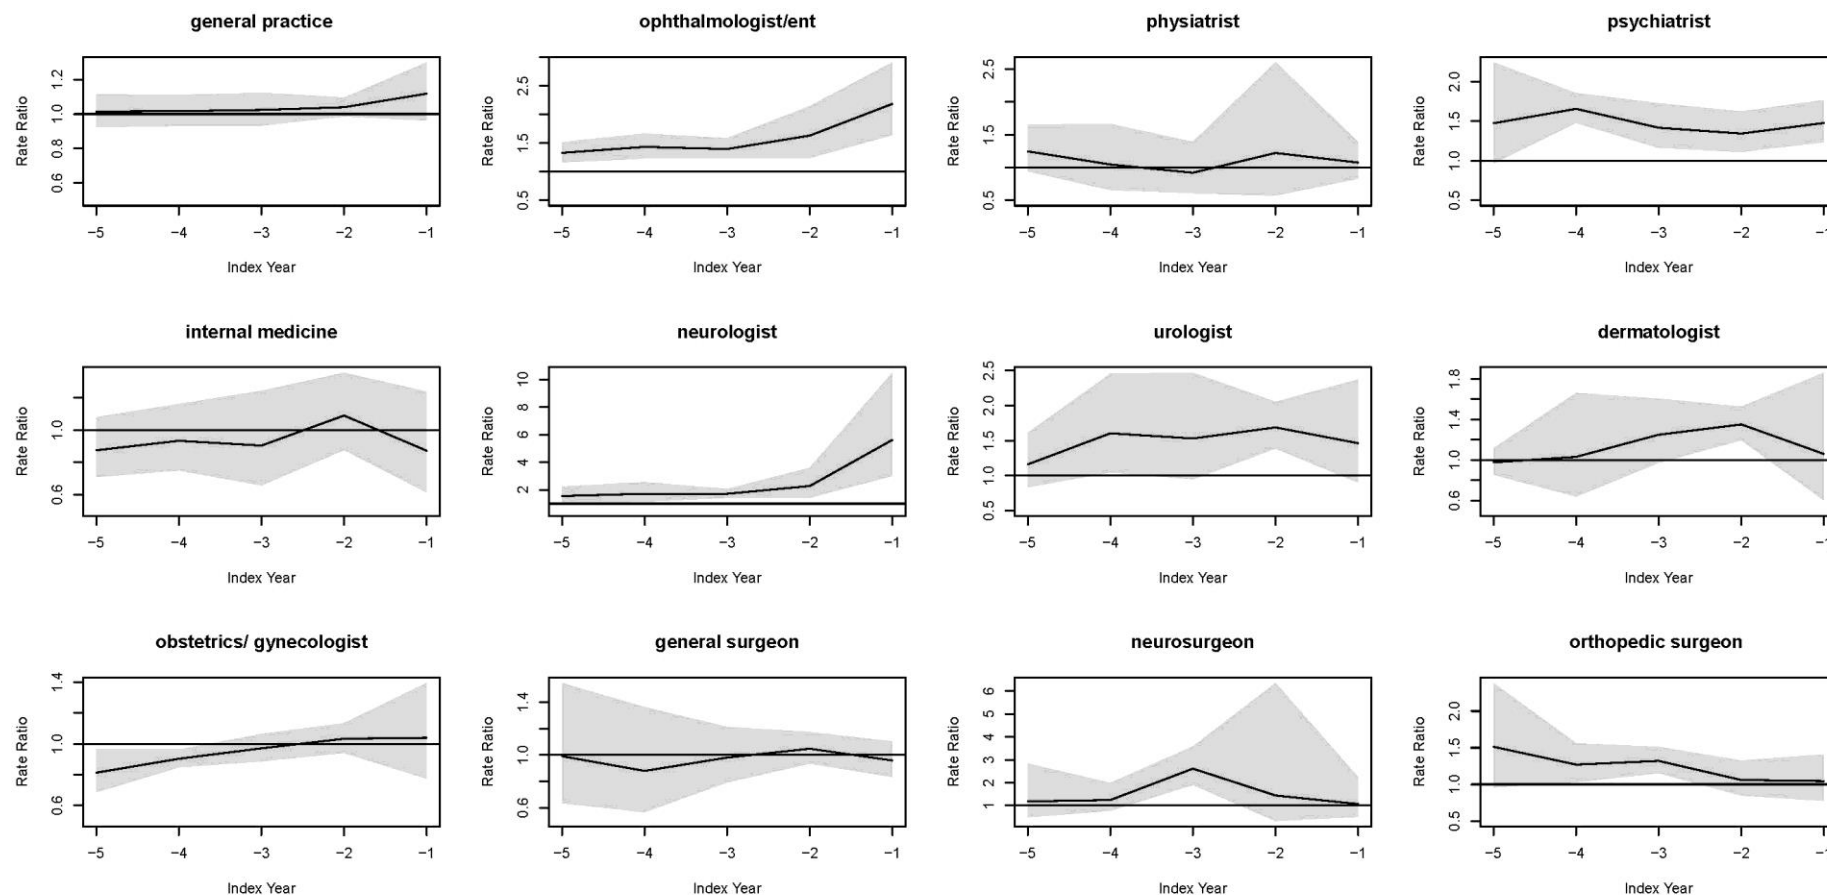

**Figure S1f Rate ratios of physician visits by physician specialty between cases and controls in the 5 years before MS symptom onset**

The x-axis represents the five-year prodromal period in years before the index date, e.g., ‘-5’ indicates the fifth year and ‘-1’ indicates the one year prior to the index date. The y-axis shows the rate ratios (RR) and the shaded area indicates the corresponding 95% confidence intervals; an  $RR > 1$  indicates increased health service utilization in the cases relative to the matched controls.



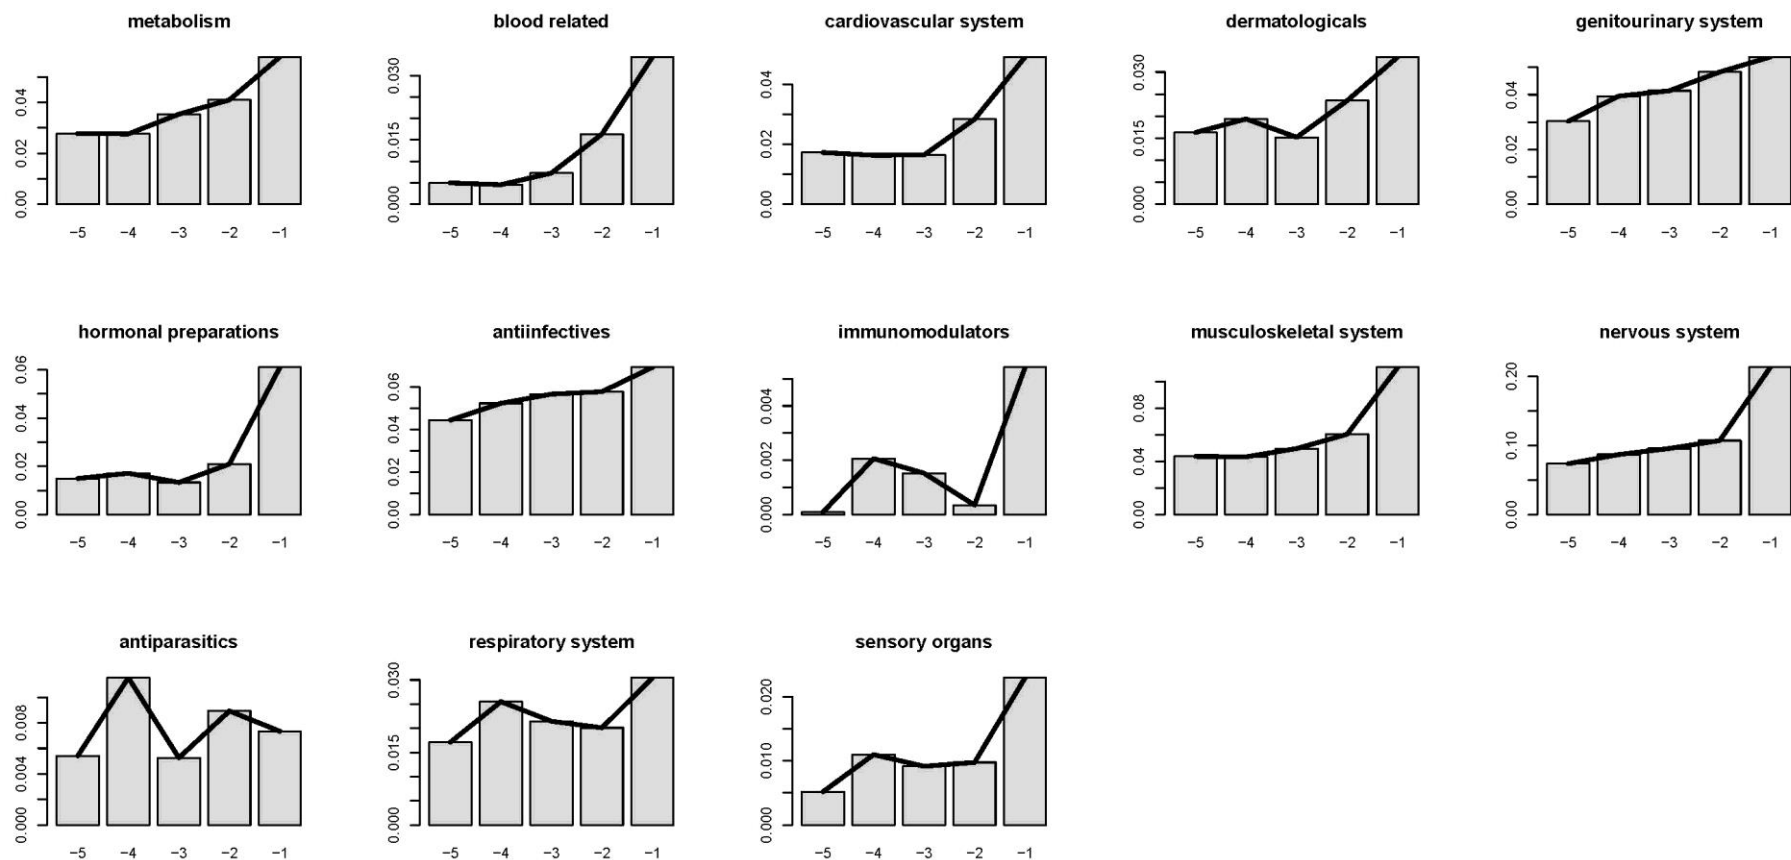

**Figure S1g Proportional differences between cases and controls by drug class (ATC level 1) in the 5 years before the first demyelinating claim**

ATC=Anatomical Therapeutic Chemical. The x-axis represents the five-year prodromal period in years before the index date, e.g., ‘-5’ indicates the fifth year and ‘-1’ indicates the one year prior to the index date. The y-axis shows the difference in the proportion of cases and the proportion of controls who filled at least 1 prescription.

Positive numbers represent a larger proportion of cases filling at least 1 prescription. Negative numbers represent a larger proportion of controls filling at least 1 prescription

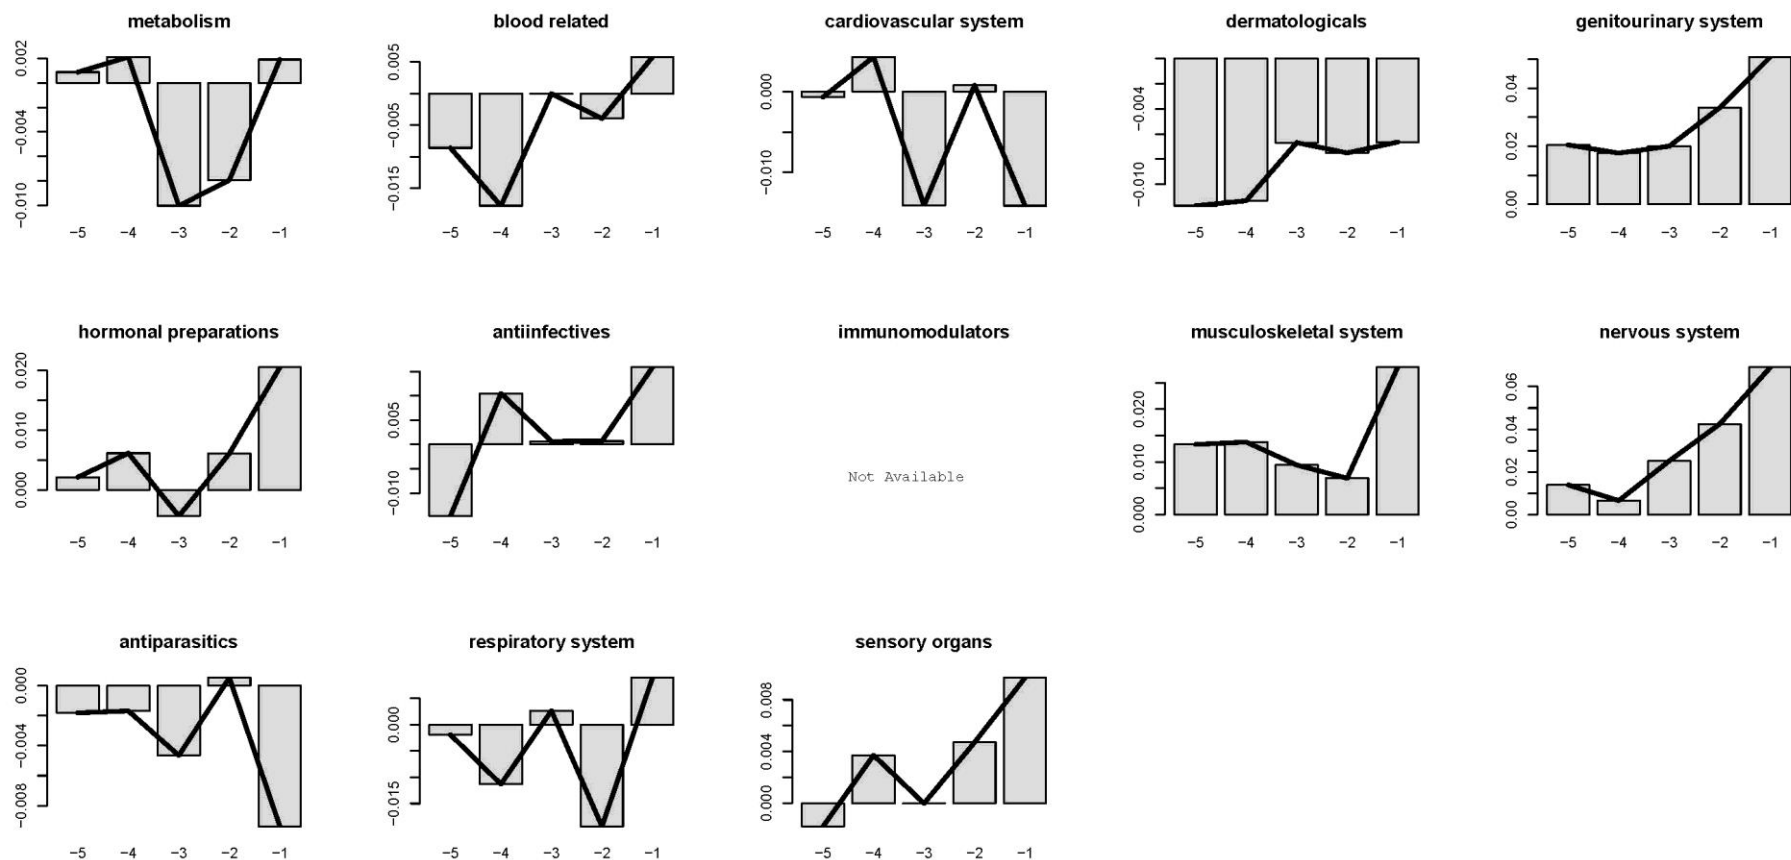

**Figure S1h Proportional differences between cases and controls by drug class (ATC level 1) in the 5 years before MS symptom onset**

ATC=Anatomical Therapeutic Chemical. The x-axis represents the five-year prodromal period in years before the index date, e.g., ‘-5’ indicates the fifth year and ‘-1’ indicates the one year prior to the index date. The y-axis shows the difference in the proportion of cases and the proportion of controls who filled at least 1 prescription. Positive numbers represent a larger proportion of cases filling at least 1 prescription. Negative numbers represent a larger proportion of controls filling at least 1 prescription. Due to privacy regulations, and as required by the data custodians, graphs where too few individuals were represented were not shown (e.g. the drug class ‘immunomodulators’ could not be shown)

**Table S1 Data availability within each of the four Canadian provinces**

|                                      | <b>British Columbia</b>        | <b>Saskatchewan</b>         | <b>Manitoba</b>                | <b>Nova Scotia</b>             |
|--------------------------------------|--------------------------------|-----------------------------|--------------------------------|--------------------------------|
| <b>Physician data<sup>1</sup></b>    | April 1991-<br>December 2013   | January 1996-<br>April 2014 | April 1984-<br>December 2013   | January 1990-<br>December 2013 |
| <b>Hospital data<sup>1</sup></b>     | January 1986-<br>December 2013 | January 1996-<br>April 2014 | April 1984-<br>December 2013   | January 1990-<br>December 2013 |
| <b>Prescription data<sup>1</sup></b> | January 1996-<br>December 2013 | January 1996-<br>April 2014 | April 1996-<br>December 2013   | N/A                            |
| <b>MS-specific clinical data</b>     | August 1980-<br>December 2008  | N/A                         | January 1989-<br>December 2013 | January 1980- December<br>2013 |

Key: 1 health administrative datasets; N/A = not available

**Table S2 Multiple sclerosis specific and demyelinating disease related codes used for identifying people with MS and the respective index date (i.e., first recorded demyelinating event)**

|                                                       | ICD-9  | ICD-10 | Drug identification number |
|-------------------------------------------------------|--------|--------|----------------------------|
| <b>MS specific diagnosis</b>                          |        |        |                            |
| Multiple sclerosis                                    | 340    | G35    | N/A                        |
| <b>Demyelinating disease</b>                          |        |        |                            |
| Optic neuritis                                        | 377.3  | H46    | N/A                        |
| Acute transverse myelitis                             | 323.82 | G37.3  | N/A                        |
|                                                       | 341.2  |        |                            |
| Acute disseminated encephalomyelitis                  | 323    | G36.9  | N/A                        |
| Demyelinating disease of CNS unspecified              | 341.9  | G37.8  | N/A                        |
| Other acute disseminated demyelination                |        | G36    | N/A                        |
| Neuromyelitis optica                                  | 341.0  | G36.0  | N/A                        |
| <b>MS specific prescription, brand name (generic)</b> |        |        |                            |
| Betaseron (IFNB-1b)                                   | N/A    | N/A    | 02169649                   |
| Extavia (IFNB-1b)                                     |        |        | 02337819                   |
| Avonex (IFNB-1a)                                      | N/A    | N/A    | 02237770                   |
|                                                       |        |        | 02269201                   |
| Rebif (IFNB-1a)                                       | N/A    | N/A    | 02281708                   |
|                                                       |        |        | 02277492                   |
|                                                       |        |        | 02237317                   |
|                                                       |        |        | 02237319                   |
|                                                       |        |        | 02237320                   |
|                                                       |        |        | 02318253                   |
|                                                       |        |        | 02318261                   |
| Copaxone (glatiramer acetate)                         | N/A    | N/A    | 02233014                   |
|                                                       |        |        | 02245619                   |
| Tysabri (natalizumab)                                 | N/A    | N/A    | 02286386                   |
| Gilenya (fingolimod)                                  | N/A    | N/A    | 02365480                   |
| Tecfidera (dimethyl fumarate)                         | N/A    | N/A    | 02404508                   |
| Aubagio (teriflunomide)                               | N/A    | N/A    | 02416328                   |
| Lemtrada (alemtuzumab)                                | N/A    | N/A    | 02418320                   |

**Table S3a Study outcomes: diagnostic codes for the ICD chapters**

| ICD Chapters                                                          | Diagnostic Codes                      | Brief overview and study-specific comments‡                                                                                                                                                                                                                                                                                              |
|-----------------------------------------------------------------------|---------------------------------------|------------------------------------------------------------------------------------------------------------------------------------------------------------------------------------------------------------------------------------------------------------------------------------------------------------------------------------------|
| Certain infectious and parasitic diseases                             | ICD-9: 001 – 139<br>ICD-10: A00 – B99 | These include bacterial, viral, parasitic, and fungal infections. Some organ-specific infections, such as cystitis and pneumonia, are included in separate chapters.                                                                                                                                                                     |
| Neoplasms                                                             | ICD-9: 140 – 239<br>ICD-10: C00 – D49 | These include malignant and benign neoplasms.                                                                                                                                                                                                                                                                                            |
| Endocrine, Nutritional And Metabolic Diseases, And Immunity Disorders | ICD-9: 240 – 279<br>ICD-10: E00 – E89 | These include: disorders of the endocrine glands, such as thyroiditis and diabetes mellitus; nutritional deficiencies; and other metabolic/immunity disorders.                                                                                                                                                                           |
| Diseases Of The Blood And Blood-Forming Organs                        | ICD-9: 280– 289<br>ICD-10: D50 – D89  | These include: anemias, such as iron or B12 deficiency; hemolytic and aplastic anemias; and diseases of the white blood cells                                                                                                                                                                                                            |
| Mental, Behavioral and Neurodevelopmental disorders                   | ICD-9: 290 – 319<br>ICD-10: F00 – F99 | These include: mood disorders, such as depression and bipolar disorder; non-mood psychotic disorders; anxiety; intellectual disabilities; developmental disorders; and emotional disorders                                                                                                                                               |
| Diseases of the nervous system                                        | ICD-9: 320 – 359<br>ICD-10: G00 – G99 | These include: inflammatory disease of the central nervous system, such as meningitis; extrapyramidal and movement disorders, such as Parkinson’s disease and dystonia; neurodegenerative disease; polyneuropathies; and paroxysmal disorders, such as epilepsy and migraine.<br><b>Demyelinating diseases were excluded (Table S2).</b> |
| Diseases of the sense organs                                          | ICD-9: 360 – 389<br>ICD-10: H00-H95   | These include: disorders of the eye, such as visual disturbances, disorders of the lens, retina, or eyelid; and disorders of the ear, such as hearing loss, vertiginous syndromes, and otitis media/externa.<br><b>Disorders of the optic nerve were excluded (Table S2).</b>                                                            |
| Diseases of the circulatory system                                    | ICD-9: 390 – 459<br>ICD-10: I00 – I99 | These include: hypertensive diseases; heart diseases, such as ischemic or pulmonary heart disease; cerebrovascular disease, such as the occlusion of cerebral arteries; and disease of the veins and arteries, such as atherosclerosis and varicose veins.                                                                               |
| Diseases of the respiratory system                                    | ICD-9: 460 – 519<br>ICD-10: J00 – J99 | These include: respiratory infections, such as influenza and pneumonia; chronic respiratory                                                                                                                                                                                                                                              |

|                                                                                                   |                                                                              |                                                                                                                                                                                                                                                                                                                                     |
|---------------------------------------------------------------------------------------------------|------------------------------------------------------------------------------|-------------------------------------------------------------------------------------------------------------------------------------------------------------------------------------------------------------------------------------------------------------------------------------------------------------------------------------|
|                                                                                                   |                                                                              | disease, such as asthma and bronchitis; and diseases of the pleura.                                                                                                                                                                                                                                                                 |
| Diseases of the digestive system                                                                  | ICD-9: 520 – 579<br>ICD-10: K00 – K95                                        | These include: disease of the intestines, such as irritable bowel syndrome; diseases of the liver, such as hepatitis and inflammatory liver disease; disorders of the gallbladder, such as acute pancreatitis; ulcers; and hernia.                                                                                                  |
| Diseases of the genitourinary system                                                              | ICD-9: 580 – 629<br>ICD-10: N00 – N99                                        | These include: disorders of the urinary tract, such as chronic kidney disease, nephritis, and cystitis; and disease of the genital organs, such as sexual dysfunction, disorders of the prostate, pelvic inflammatory disorders, absent or excessive menstruation; and disorders of the breast, such as unspecified lump in breast. |
| Pregnancy, childbirth and the puerperium                                                          | ICD-9: 630-679<br>ICD-10: O00–O99, and O9A                                   | These include: encounters for delivery; maternal care related to the fetus, such as multiple gestation and fetal problems; pregnancy with abortive outcomes; maternal disorders, such as diabetes mellitus, excessive vomiting, and venous complications.                                                                           |
| Diseases of the skin and subcutaneous tissues                                                     | ICD-9: 680 – 709<br>ICD-10: L00 – L99                                        | These include: infections of the skin; dermatitis and eczema; erythema; and papulosquamous disorders, such as psoriasis.                                                                                                                                                                                                            |
| Diseases of the musculoskeletal system and connective tissues                                     | ICD-9: 710 – 739<br>ICD-10: M00 – M99                                        | These include: arthropathies; dorsopathies; osteopathies; spondylopathies; osteoarthritis; and disorders of the muscles.                                                                                                                                                                                                            |
| Congenital anomalies                                                                              | ICD-9: 740-759<br>ICD-10: Q00–Q99                                            | These include congenital malformations of the nervous system, circulatory system, respiratory system, genital organs, urinary system, eyes, and ears.                                                                                                                                                                               |
| Symptoms, Signs, And Ill-Defined Conditions                                                       | ICD-9: 780 – 799<br>ICD-10: R00 – R99                                        | These include symptoms and signs involving the circulatory, respiratory, nervous, musculoskeletal, genitourinary system. As well as, symptoms involving cognition, emotional state, behaviour, speech. Abnormal findings on examination of blood, urine or other body fluids.                                                       |
| Injury and poisoning<br>External causes of morbidity<br>Complication of surgical and medical care | ICD-9: 800-999<br>ICD-9: E800 – E999<br>ICD-10: S00 – T98<br>ICD-10: V00-Y99 | These include: injuries and burns; poisoning; accidents; slipping and falls; and misadventures during surgical and medical care.                                                                                                                                                                                                    |

Conditions originating in the perinatal period (ICD-9: 760-779/ ICD-10: P00–P96) were not assessed

‡Specified conditions were excluded, as per the study design (outlined in the Methods)

**Table S3b Study outcomes: drug classes based on the Anatomical Therapeutic Chemical Classification System, Level**

**Table S3c Study outcomes: physician specialty**

| Anatomical group (ATC level 1)                                      | ATC Code | Brief overview and study-specific comments‡                                                                                                                                                |
|---------------------------------------------------------------------|----------|--------------------------------------------------------------------------------------------------------------------------------------------------------------------------------------------|
| Alimentary tract and metabolism                                     | A        | These include: drugs for gastrointestinal disorders; anti-nauseants; bile and liver therapy; antidiarrheals; vitamins; and drugs used in diabetes.                                         |
| Blood and blood forming organs                                      | B        | These include: antithrombotic agents; anti-hemorrhagics; anti-anemic preparations; and blood substitutes.                                                                                  |
| Cardiovascular system                                               | C        | These include: anti-hypertensives; diuretics; vasodilators; and lipid modifying agents.                                                                                                    |
| Dermatologicals                                                     | D        | These include: antifungals; anti-psoriatics; antibiotics and corticosteroids for dermatological use; preparations for treatment of wounds and ulcers; and anti-acne preparations.          |
| Genito-urinary system and sex hormones                              | G        | These include: gynecological anti-infectives; sex hormones, modulators of the genital system; and urologicals                                                                              |
| Systemic hormonal preparations, excluding sex hormones and insulins | H        | These include: pituitary and hypothalamic hormones; corticosteroids; thyroid therapy; pancreatic hormones; and calcium homeostasis                                                         |
| Antiinfectives for systemic use                                     | J        | These include: anti-bacterials, anti-mycotics, anti-mycobacterials and antivirals for systemic use; immunoglobulins; and vaccines                                                          |
| Antineoplastic and immunomodulating agents                          | L        | These include: anti-neoplastic agents; endocrine therapy; immunostimulants; and immunosuppressants<br><b>MS specific drugs were excluded (Table S2)</b>                                    |
| Musculo-skeletal system                                             | M        | These include: anti-inflammatory and anti-rheumatic products; topical products for joint/muscular pain; muscle relaxants; anti-gout preparations; and drugs for treatment of bone disease. |
| Nervous system                                                      | N        | These include: anesthetics; analgesics; anti-epileptics; anti-parkinsons drugs; and psycholeptics; psychoanaleptics.<br><b>MS specific drugs were excluded (Table S2)</b>                  |
| Anti-parasitic products, insecticides and repellents                | P        | These include: anti-protozoals; anti-helminths; and ectoparasitocides                                                                                                                      |
| Respiratory system                                                  | R        | These include: nasal and throat preparations; drugs for obstructive airway diseases; cough and cold preparations; and antihistamines for systemic use.                                     |
| Sensory organs                                                      | S        | These include ophthalmologicals and otologicals.                                                                                                                                           |
| Various                                                             | V        | These include: allergens; diagnostics agents; nutrients; contrast media; radiopharmaceuticals; and surgical dressings                                                                      |

| Physician speciality                                                                           |
|------------------------------------------------------------------------------------------------|
| Primary care provider / general practice                                                       |
| Ophthalmologist and otolaryngologist                                                           |
| Physiatrist (i.e. physical medicine & rehabilitation specialist)                               |
| Psychiatrist (also includes neuropsychiatrist)                                                 |
| Internal medicine physician (also includes rheumatologist, cardiologist, and gastroenterology) |
| Neurologist                                                                                    |
| Urologist                                                                                      |
| Dermatologist                                                                                  |
| Obstetrics and gynecologist                                                                    |
| General surgeon                                                                                |
| Neurosurgeon                                                                                   |
| Orthopedic surgeon                                                                             |



**Table S3d Study outcomes: algorithms used to identify morbidities**

| Morbidity                      | Years of data      | Algorithm:<br>number and type<br>of encounters | ICD9 codes                                                                                                                     | ICD10 codes                  |
|--------------------------------|--------------------|------------------------------------------------|--------------------------------------------------------------------------------------------------------------------------------|------------------------------|
| <b><i>Mental health</i></b>    |                    |                                                |                                                                                                                                |                              |
| Any mood or anxiety disorder   | 5                  | ≥1 H or ≥5P                                    | 300.0, 300.2, 296.0, 296.1, 296.04, 296.14, 296.4, 296.44, 296.5, 296.54, 296.6, 296.7, 296.8, 296.2, 296.3, 298.0, 300.4, 311 | F40, F41, F31, F32, F33, F34 |
| Schizophrenia                  | 2                  | ≥1H or ≥2P                                     | 295                                                                                                                            | F20, F25                     |
| <b><i>Vascular</i></b>         |                    |                                                |                                                                                                                                |                              |
| Hypertension                   | 2                  | ≥1H or ≥2P                                     | 401-405                                                                                                                        | I10-I13, I15                 |
| Hyperlipidemia                 | 5                  | ≥1H or ≥2P                                     | 272                                                                                                                            | E780, E782, E784, E785       |
| Diabetes                       | 5                  | ≥1H or ≥2P                                     | 250                                                                                                                            | E10 -E14                     |
| Ischemic heart disease         | 5                  | ≥1 H or ≥2P                                    | 410–414                                                                                                                        | I20–I25                      |
| <b><i>Other neurologic</i></b> |                    |                                                |                                                                                                                                |                              |
| Epilepsy                       | 3                  | ≥1 H OR ≥2P                                    | 345                                                                                                                            | G40, G41                     |
| <b><i>Other</i></b>            |                    |                                                |                                                                                                                                |                              |
| Fibromyalgia                   | 3                  | ≥5 (H or P)                                    | 729.1                                                                                                                          | M79.7                        |
| Irritable bowel syndrome       | 2                  | ≥1 H or ≥2P                                    | 564.1                                                                                                                          | K58                          |
| Chronic lung disease           | 5                  | ≥1H or ≥2P                                     | 493, 491, 492, 496                                                                                                             | J45, J46, J40, J42, J43, J44 |
| <b><i>Autoimmune</i></b>       |                    |                                                |                                                                                                                                |                              |
| Inflammatory bowel disease     | All available data | ≥5 (H or P)                                    | 555, 556                                                                                                                       | K50, K51                     |

Key: ICD: International Classification of Diseases; ATC: Anatomical Therapeutic Chemical; H: hospital; P: physician visits; Rx: prescription

**Table S3d Study outcomes: algorithms used to identify morbidities (continued)**

| Morbidity                                  | Years of data | Algorithm: number and type of encounters | ICD9 codes                | ICD10 codes      | ATC codes                                                                                     |
|--------------------------------------------|---------------|------------------------------------------|---------------------------|------------------|-----------------------------------------------------------------------------------------------|
| <i>Neurological</i>                        |               |                                          |                           |                  |                                                                                               |
| Migraine                                   | 2             | $\geq 2$ (H or P or Rx)                  | 345, 625.4                | G43              | N02CA<br>N02CC<br>N02CX                                                                       |
| <i>Autoimmune</i>                          |               |                                          |                           |                  |                                                                                               |
| Thyroid disorder (Autoimmune) <sup>1</sup> | 1             | $\geq 1$ H or $\geq 1$ P or $\geq 1$ Rx  | 242, 376.21, 376.22, 245, | E05.0<br>E06.3   | H03AA01<br>H03AA05<br>H03BA02<br>H03BA03<br>H03BB02<br>H03CA                                  |
| Psoriasis                                  | 3             | $\geq 2$ (H or P or Rx)                  | 696.0, 696.1              | L40, M07.0-M07.3 | D05AC01<br>D05AC51<br>D05AX<br>D05AX02<br>D05AX03<br>D05AX05<br>D05AX52<br>D05BA03<br>D05BB02 |

Key: ICD: International Classification of Diseases; ATC: Anatomical Therapeutic Chemical; H: hospital; P: physician visits; Rx: prescription

<sup>1</sup> People who were either diagnosed with thyroid neoplasm, underwent thyroid surgery, or filled a prescription for lithium (ATC= N05AN01) pre-‘onset’ of a thyroid condition were not included here

**Table S4a Characteristics of the health administrative cohorts by province at the index date**

| Characteristics at the index date <sup>1</sup>                           | British Columbia         |                      | Saskatchewan             |                     | Manitoba                 |                      | Nova Scotia              |                      |
|--------------------------------------------------------------------------|--------------------------|----------------------|--------------------------|---------------------|--------------------------|----------------------|--------------------------|----------------------|
|                                                                          | MS population<br>N=6,863 | Controls<br>N=31,865 | MS population<br>N=1,806 | Controls<br>N=9,002 | MS population<br>N=2,992 | Controls<br>N=14,960 | MS population<br>N=2,290 | Controls<br>N=11,113 |
| Sex, N (%)                                                               |                          |                      |                          |                     |                          |                      |                          |                      |
| Men                                                                      | 1,824 (25.2)             | 8,554 (23.6)         | 562 (31.1)               | 2,795 (31.0)        | 823 (27.5)               | 4,115 (27.5)         | 586 (25.6)               | 2,854 (25.7)         |
| Women                                                                    | 5,039 (69.5)             | 23,311 (64.4)        | 1,244 (68.9)             | 6,207 (69.0)        | 2,169 (72.5)             | 10,845 (72.5)        | 1,704 (74.4)             | 8,259 (74.3)         |
| Age (yrs):                                                               |                          |                      |                          |                     |                          |                      |                          |                      |
| Mean (SD)                                                                | 44.9 (13.5)              | 44.7 (13.4)          | 43.3 (14.1)              | 43.3 (14.3)         | 40.9 (13.1)              | 40.9 (13.1)          | 42.9 (12.7)              | 42.9 (12.7)          |
| <30                                                                      | 859 (11.8)               | 4,081 (11.3)         | 322 (17.8)               | 1,605 (17.8)        | 597 (20.0)               | 2,989 (20.0)         | 333 (14.5)               | 1,619 (14.6)         |
| 30 to <50                                                                | 3,827 (52.8)             | 17,898 (49.4)        | 945 (52.3)               | 4,683 (52.0)        | 1,704 (57.0)             | 8,503 (56.8)         | 1,375 (60.0)             | 6,647 (59.8)         |
| ≥50                                                                      | 2,177 (30.0)             | 9,886 (27.3)         | 539 (29.8)               | 2,714 (30.1)        | 691 (23.1)               | 3,468 (23.2)         | 582 (25.4)               | 2,847 (25.6)         |
| SES, N (%)                                                               |                          |                      |                          |                     |                          |                      |                          |                      |
| 1 (lowest income quintile)                                               | 1,173 (16.2)             | 5,537 (15.3)         | 361 (20.0)               | 1,792 (19.9)        | 455 (15.2)               | 2,527 (16.9)         | 422 (18.4)               | 2,273 (20.5)         |
| 2                                                                        | 1,297 (17.9)             | 5,964 (16.5)         | 360 (19.9)               | 1,824 (20.3)        | 579 (19.4)               | 2,850 (19.1)         | 460 (20.1)               | 2,313 (20.8)         |
| 3                                                                        | 1,431 (19.7)             | 6,357 (17.6)         | 363 (20.1)               | 1,783 (19.8)        | 672 (22.5)               | 3,127 (20.9)         | 468 (20.4)               | 2,196 (19.8)         |
| 4                                                                        | 1,433 (19.8)             | 6,782 (18.7)         | 361 (20.0)               | 1,795 (19.9)        | 582 (19.5)               | 3,158 (21.1)         | 494 (21.6)               | 2,224 (20.0)         |
| 5 (highest income quintile)                                              | 1,376 (19.0)             | 6,532 (18.0)         | 361 (20.0)               | 1,798 (20.0)        | 663 (22.2)               | 3,211 (21.5)         | 440 (19.2)               | 2,062 (18.6)         |
| Missing                                                                  | 153 (2.1)                | 693 (1.9)            | 0                        | 10 (0.1)            | 41 (1.4)                 | 87 (0.6)             | 6 (0.3)                  | 45 (0.4)             |
| Index year, N (%)                                                        |                          |                      |                          |                     |                          |                      |                          |                      |
| 1990-1997                                                                | 693 (9.6)                | 3,171 (8.8)          | 0                        | 0                   | 1,084 (36.2)             | 5,420 (36.2)         | 491 (21.4)               | 2,370 (21.3)         |
| 1998-2005                                                                | 3,457 (47.7)             | 15,959 (44.1)        | 859 (47.6)               | 4,281 (47.6)        | 1,113 (37.2)             | 5,565 (37.2)         | 1,026 (44.8)             | 4,974 (44.8)         |
| 2006-2013                                                                | 2,713 (37.4)             | 12,735 (35.2)        | 947 (52.4)               | 4,721 (52.4)        | 795 (26.6)               | 3,975 (26.6)         | 773 (33.8)               | 3,769 (33.9)         |
| Time (yrs) between index date and diagnosis date, Mean (SD) <sup>2</sup> | 1.1 (1.9)                | NA                   | 1.0 (1.7)                | NA                  | 1.5 (2.7)                | NA                   | 1.2 (2.0)                | NA                   |

MS: multiple sclerosis; N/A: not applicable; yrs: years; SD: standard deviation; SES: socioeconomic status. <sup>1</sup> The index date represents the first demyelinating disease related code, as recorded by a physician. <sup>2</sup> The diagnosis date represents the third MS code

**Table S4b Characteristics of the MS Clinic-derived cohorts by province at the index date**

| Characteristics at the index date <sup>1</sup>              | British Columbia       |                     | Manitoba                 |                     | Nova Scotia              |                     |
|-------------------------------------------------------------|------------------------|---------------------|--------------------------|---------------------|--------------------------|---------------------|
|                                                             | MS population<br>N=966 | Controls<br>N=4,826 | MS population<br>N=1,117 | Controls<br>N=5,585 | MS population<br>N=1,119 | Controls<br>N=5,595 |
| Sex, N (%)                                                  |                        |                     |                          |                     |                          |                     |
| Men                                                         | 238 (24.6)             | 1190 (24.7)         | 313 (28.0)               | 1565 (28.0)         | 283 (25.3)               | 1,415 (25.3)        |
| Women                                                       | 728 (75.4)             | 3,636 (75.3)        | 804 (72.0)               | 4,020 (72.0)        | 836 (74.7)               | 4,180 (74.7)        |
| Age (yrs):                                                  |                        |                     |                          |                     |                          |                     |
| Mean (SD)                                                   | 37.5 (10.2)            | 37.5 (10.2)         | 35.1 (10.4)              | 35.1 (10.4)         | 36.9 (10.3)              | 36.9 (10.3)         |
| <30                                                         | 233 (24.1)             | 1,149 (23.8)        | 365 (32.7)               | 1,801 (32.2)        | 299 (26.7)               | 1,485 (26.5)        |
| 30 to <50                                                   | 638 (66.0)             | 3,182 (65.9)        | 647 (57.9)               | 3,269 (58.5)        | 706 (63.1)               | 3,544 (63.3)        |
| ≥50                                                         | 95 (9.8)               | 495 (10.3)          | 105 (9.4)                | 515 (9.2)           | 114 (10.2)               | 566 (10.1)          |
| SES, N (%)                                                  |                        |                     |                          |                     |                          |                     |
| 1 (lowest income quintile)                                  | 153 (15.8)             | 829 (17.2)          | 191 (17.1)               | 868 (15.5)          | 208 (18.6)               | 1,143 (20.4)        |
| 2                                                           | 180 (18.6)             | 853 (17.7)          | 203 (18.2)               | 1,021 (18.3)        | 233 (20.8)               | 1,203 (21.5)        |
| 3                                                           | 189 (19.6)             | 932 (19.3)          | 252 (22.6)               | 1,166 (20.9)        | 249 (22.3)               | 1,146 (20.5)        |
| 4                                                           | 204 (21.1)             | 1,028 (21.3)        | 212 (19.0)               | 1,201 (21.5)        | 218 (19.5)               | 1,083 (19.4)        |
| 5 (highest income quintile)                                 | 215 (22.3)             | 1,024 (21.2)        | 256 (22.9)               | 1,303 (23.3)        | 209 (18.7)               | 1,005 (18.0)        |
| Missing                                                     | 25 (2.6)               | 160 (3.3)           | <6 (<0.5) <sup>3</sup>   | 26 (0.5)            | <6 (<0.5) <sup>3</sup>   | 15 (0.3)            |
| Index year, N (%)                                           |                        |                     |                          |                     |                          |                     |
| 1989-1997                                                   | 207 (21.4)             | 1,035 (21.4)        | 320 (28.6)               | 1,600 (28.6)        | 182 (16.3)               | 910 (16.3)          |
| 1998-2005                                                   | 726 (75.2)             | 3,626 (75.1)        | 421 (37.7)               | 2,105 (37.7)        | 537 (48.0)               | 2,685 (48.0)        |
| 2006-2013                                                   | 33 (3.4)               | 165 (3.4)           | 376 (33.7)               | 1,880 (33.7)        | 400 (35.7)               | 2,000 (35.7)        |
| Time (yrs) between index date and diagnosis date, Mean (SD) | 2.1 (1.9)              | NA                  | 2.5 (3.5)                | NA                  | 2.7 (2.4)                | NA                  |

MS: multiple sclerosis; N/A: not applicable; yrs: years; SD: standard deviation; SES: socioeconomic status. Due to privacy regulations, and as required by the data custodians, cells with less than 6 cases cannot be reported

<sup>1</sup> The index date represents the date of MS symptom onset, as recorded by an MS neurologist.

**Table S5 Five years before the first demyelinating claim or MS symptom onset: rate ratios for physician and hospital encounters by ICD chapter, comparing MS cases and controls**

| ICD Chapter                                                         | Administrative cohort <sup>1</sup> |                         | MS Clinic-derived cohort <sup>2</sup> |                         |
|---------------------------------------------------------------------|------------------------------------|-------------------------|---------------------------------------|-------------------------|
|                                                                     | Physician visits                   | Hospital admissions     | Physician visits                      | Hospital admissions     |
|                                                                     | RR (95%CI)                         | RR (95%CI)              | RR (95%CI)                            | RR (95%CI)              |
| Certain infectious and parasitic diseases                           | <b>1.19 (1.09-1.29)</b>            | <b>1.94 (1.60-2.36)</b> | 1.00 (0.92-1.07)                      | 1.20 (0.58-2.45)        |
| Neoplasms                                                           | <b>1.15 (1.12-1.18)</b>            | <b>1.13 (1.05-1.22)</b> | 0.91 (0.74-1.12)                      | 0.94 (0.79-1.14)        |
| Endocrine Nutritional and Metabolic Diseases and Immunity Disorders | <b>1.14 (1.03-1.27)</b>            | 1.41 (0.82-2.43)        | 0.93 (0.81-1.07)                      | 0.74 (0.47-1.17)        |
| Diseases of the Blood and Blood-Forming Organs                      | <b>1.58 (1.32-1.88)</b>            | 1.33 (0.65-2.72)        | <b>1.24 (1.00-1.54)</b>               | 0.81 (0.28-2.35)        |
| Mental Behavioral and Neurodevelopmental disorders                  | <b>1.53 (1.12-2.09)</b>            | 1.38 (0.60-3.21)        | 1.12 (0.85-1.48)                      | 0.69 (0.34-1.41)        |
| Diseases of the nervous system                                      | <b>4.38 (3.25-5.90)</b>            | <b>4.75 (3.11-7.25)</b> | 1.70 (0.96-3.00)                      | <b>2.31 (1.05-5.10)</b> |
| Diseases of the sense organs                                        | <b>1.62 (1.55-1.68)</b>            | <b>1.47 (1.31-1.65)</b> | <b>1.40 (1.34-1.46)</b>               | <b>2.28 (1.72-3.02)</b> |
| Diseases of the circulatory system                                  | <b>1.26 (1.23-1.29)</b>            | <b>1.29 (1.17-1.42)</b> | 0.96 (0.86-1.08)                      | 0.85 (0.63-1.14)        |
| Diseases of the respiratory systems                                 | <b>1.15 (1.09-1.21)</b>            | <b>1.37 (1.08-1.74)</b> | 0.99 (0.96-1.01)                      | 0.88 (0.66-1.18)        |
| Diseases of the digestive system                                    | <b>1.33 (1.22-1.44)</b>            | <b>1.35 (1.18-1.54)</b> | 1.03 (0.83-1.28)                      | 1.05 (0.81-1.35)        |
| Diseases of the genitourinary system                                | <b>1.24 (1.11-1.37)</b>            | <b>1.59 (1.48-1.70)</b> | 1.03 (0.98-1.08)                      | <b>1.17 (1.05-1.30)</b> |
| Pregnancy childbirth and the puerperium                             | <b>0.86 (0.82-0.91)</b>            | <b>0.88 (0.84-0.92)</b> | <b>0.81 (0.73-0.90)</b>               | <b>0.78 (0.71-0.86)</b> |
| Diseases of the skin and subcutaneous tissues                       | <b>1.20 (1.11-1.29)</b>            | <b>1.39 (1.11-1.74)</b> | 1.05 (0.94-1.18)                      | <b>1.37 (1.04-1.82)</b> |
| Diseases of the musculoskeletal system and connective tissues       | <b>1.70 (1.57-1.85)</b>            | <b>1.61 (1.22-2.12)</b> | <b>1.19 (1.07-1.33)</b>               | <b>1.25 (1.02-1.53)</b> |
| Congenital anomalies                                                | <b>1.48 (1.14-1.92)</b>            | <b>1.74 (1.20-2.52)</b> | 0.97 (0.80-1.18)                      | 1.86 (0.54-6.36)        |
| Symptoms, Signs, and Ill-Defined Conditions                         | <b>1.92 (1.71-2.16)</b>            | <b>2.34 (2.04-2.70)</b> | <b>1.16 (1.07-1.27)</b>               | 1.21 (0.96-1.52)        |
| Injury, poisoning, and complication of surgical/medical care        | <b>1.29 (1.12-1.47)</b>            | <b>1.31 (1.10-1.55)</b> | 1.06 (0.95-1.18)                      | 0.98 (0.86-1.12)        |

Key: RR: rate ratio; CI: confidence interval. Findings are also depicted in Figures 1 and 2

ICD chapter "Certain conditions originating in the perinatal period" was not assessed due to limited number of cases

The index dates were defined as: <sup>1</sup>the first demyelinating disease code or <sup>2</sup> the date of MS symptom onset, as recorded by an MS neurologist

**Table S6 Five years before the first demyelinating claim or MS symptom onset: rate ratios of physician encounters by physician specialty, comparing MS cases and controls**

| Physician specialty                    | Administrative cohort <sup>1</sup> | MS Clinic-derived cohort <sup>2</sup> |
|----------------------------------------|------------------------------------|---------------------------------------|
|                                        | RR (95%CI)                         | RR (95%CI)                            |
| Primary care provider/general practice | <b>1.35 (1.25-1.45)</b>            | 1.04 (0.96-1.13)                      |
| Ophthalmologist and Otolaryngologist   | <b>1.76 (1.64-1.90)</b>            | <b>1.61 (1.44-1.80)</b>               |
| Physiatrist                            | <b>3.20 (2.86-3.57)</b>            | 1.07 (0.95-1.21)                      |
| Psychiatrist                           | <b>1.66 (1.20-2.30)</b>            | <b>1.48 (1.36-1.62)</b>               |
| Internal medicine physicians           | <b>1.53 (1.39-1.67)</b>            | 0.93 (0.76-1.14)                      |
| Neurologist                            | <b>9.02 (7.53-10.80)</b>           | <b>2.66 (1.64-4.30)</b>               |
| Urologist                              | <b>1.80 (1.61-2.01)</b>            | <b>1.49 (1.15-1.91)</b>               |
| Dermatologist                          | <b>1.16 (1.10-1.23)</b>            | 1.14 (0.91-1.42)                      |
| Obstetrics and gynecologist            | <b>1.07 (1.04-1.11)</b>            | 0.95 (0.90-1.00)                      |
| General surgeon                        | <b>1.29 (1.21-1.36)</b>            | 0.97 (0.79-1.20)                      |
| Neurosurgeon                           | <b>3.63 (2.81-4.69)</b>            | 1.54 (0.90-2.65)                      |
| Orthopedic surgeon                     | <b>1.47 (1.43-1.52)</b>            | <b>1.24 (1.17-1.32)</b>               |
| All internal medicine physicians       | <b>2.10 (2.03-2.17)</b>            | 1.14 (0.98-1.33)                      |
| All surgeons                           | <b>1.43 (1.35-1.51)</b>            | 1.09 (0.94-1.25)                      |

Key: RR: rate ratio; CI: confidence interval. Findings are also depicted in Figures 1 and 2

The index dates were defined as: <sup>1</sup>the first demyelinating disease related code or <sup>2</sup> the date of MS symptom onset, as recorded by an MS neurologist

**Table S7 Five years before the first demyelinating claim or MS symptom onset: proportion with a least one prescription by ATC level 1**

| Drug class                                          | Administrative cohort <sup>1</sup> |             |             |         | MS Clinic-derived cohort <sup>2</sup> |            |            |              |
|-----------------------------------------------------|------------------------------------|-------------|-------------|---------|---------------------------------------|------------|------------|--------------|
|                                                     | MS                                 |             | Controls    | p-value | MS                                    |            | Controls   | p-value      |
|                                                     | N                                  | No. (%)     | No. (%)     |         | N                                     | No. (%)    | No. (%)    |              |
| Alimentary tract and metabolism                     | 8122                               | 3200 (39.4) | 2500 (30.8) | <0.001  | 1005                                  | 291 (29.0) | 296 (29.5) | 0.808        |
| Blood and blood forming organs                      | 8122                               | 951 (11.7)  | 596 (7.3)   | <0.001  | 1005                                  | 56 (5.6)   | 64 (6.4)   | 0.453        |
| Cardiovascular system                               | 8122                               | 2580 (31.8) | 2005 (24.7) | <0.001  | 1005                                  | 200 (19.9) | 183 (18.2) | 0.325        |
| Dermatologicals                                     | 8122                               | 3642 (44.8) | 3202 (39.4) | <0.001  | 1005                                  | 445 (44.2) | 427 (42.5) | 0.430        |
| Genito-urinary system and sex hormones              | 8122                               | 3382 (41.6) | 2796 (34.4) | <0.001  | 1005                                  | 438 (43.6) | 383 (38.1) | <b>0.012</b> |
| Systemic hormonal preparations                      | 8122                               | 2123 (26.1) | 1446 (17.8) | <0.001  | 1005                                  | 203 (20.2) | 158 (15.7) | <b>0.009</b> |
| Anti-infectives of systemic use                     | 8122                               | 6724 (82.8) | 6169 (75.9) | <0.001  | 1005                                  | 823 (81.9) | 809 (80.5) | 0.414        |
| Anti-neoplastic and immunomodulating agents         | 8122                               | 247 (3.0)   | 173 (2.1)   | <0.001  | 628                                   | 25 (4.0)   | 9 (1.5)    | <b>0.007</b> |
| Musculoskeletal system                              | 8122                               | 4520 (55.7) | 3485 (42.9) | <0.001  | 1005                                  | 480 (47.8) | 419 (41.7) | <b>0.006</b> |
| Nervous system                                      | 8122                               | 5853 (72.1) | 4472 (55.1) | <0.001  | 1005                                  | 646 (64.3) | 598 (59.5) | <b>0.027</b> |
| Anti-parasitic products insecticides and repellents | 8122                               | 1144 (14.1) | 909 (11.2)  | <0.001  | 1005                                  | 101 (10.0) | 104 (10.4) | 0.784        |
| Respiratory system                                  | 8122                               | 3131 (38.6) | 2657 (32.7) | <0.001  | 1005                                  | 340 (33.8) | 341 (33.9) | 0.963        |
| Sensory organs                                      | 8122                               | 2046 (25.2) | 1749 (21.5) | <0.001  | 1005                                  | 229 (22.8) | 207 (20.6) | 0.229        |

Key: ATC: Anatomical Therapeutic Chemical. Findings are also depicted in Figure 3. The drug class 'various' was not assessed due to limited number of cases.

The index dates were defined as: <sup>1</sup>the first demyelinating disease related code or <sup>2</sup> the date of MS symptom onset, as recorded by an MS neurologist

**Table S8 Prevalence of morbidities during the five years before the first demyelinating claim or MS symptom onset**

| Morbidity                                 | Administrative cohort <sup>1</sup> |              |              |         | MS Clinic-derived cohort <sup>2</sup> |            |            |         |
|-------------------------------------------|------------------------------------|--------------|--------------|---------|---------------------------------------|------------|------------|---------|
|                                           | MS                                 |              | Controls     |         | MS                                    |            | Controls   |         |
|                                           | N                                  | No. (%)      | No. (%)      | p-value | N                                     | No. (%)    | No. (%)    | p-value |
| <b>Mental health</b>                      |                                    |              |              |         |                                       |            |            |         |
| Any mood or anxiety disorder <sup>3</sup> | 13,951                             | 3,221 (23.8) | 2,152 (15.4) | <0.001  | 3,202                                 | 591 (18.5) | 482 (15.1) | <0.001  |
| Schizophrenia                             | 13,951                             | 75 (0.5)     | 86 (0.6)     | 0.385   | -                                     | -          | -          | -       |
| <b>Vascular</b>                           |                                    |              |              |         |                                       |            |            |         |
| Hypertension                              | 13,951                             | 2,001 (14.3) | 1,798 (12.9) | <0.001  | 3,202                                 | 195 (6.1)  | 201 (6.3)  | 0.741   |
| Hyperlipidemia                            | 13,951                             | 813 (5.8)    | 792 (5.7)    | 0.590   | 3,202                                 | 85 (2.6)   | 97 (3.0)   | 0.346   |
| Diabetes                                  | 13,951                             | 672 (4.8)    | 685 (4.9)    | 0.719   | 3,202                                 | 63 (2.0)   | 77 (2.4)   | 0.257   |
| Ischemic heart disease                    | 13,951                             | 508 (3.6)    | 423 (3.0)    | 0.005   | 2,085 <sup>5</sup>                    | 29 (1.4)   | 32 (1.5)   | 0.711   |
| <b>Neurological</b>                       |                                    |              |              |         |                                       |            |            |         |
| Epilepsy                                  | 13,951                             | 192 (1.4)    | 88 (0.6)     | <0.001  | 2,085 <sup>5</sup>                    | 14 (0.7)   | 11 (0.5)   | 0.507   |
| Migraine <sup>4</sup>                     | 8,122                              | 635 (7.8)    | 353 (4.3)    | <0.001  | 1,005                                 | 78 (7.8)   | 50 (5.0)   | 0.011   |
| <b>Autoimmune</b>                         |                                    |              |              |         |                                       |            |            |         |
| Inflammatory bowel disease                | 13,951                             | 97 (0.7)     | 74 (0.5)     | 0.078   | 1,119 <sup>5,6</sup>                  | 12 (1.1)   | 10 (0.9)   | 0.668   |
| Thyroid disorder <sup>4</sup>             | 8,122                              | 627 (7.7)    | 542 (6.7)    | 0.009   | 1,005                                 | 45 (4.5)   | 37 (3.7)   | 0.360   |
| Psoriasis <sup>4</sup>                    | 8,122                              | 92 (1.1)     | 76 (0.9)     | 0.209   | -                                     | -          | -          | -       |
| <b>Other</b>                              |                                    |              |              |         |                                       |            |            |         |
| Fibromyalgia                              | 13,951                             | 631 (4.5)    | 200 (1.4)    | <0.001  | 2,236 <sup>6</sup>                    | 47 (2.1)   | 36 (1.6)   | 0.205   |
| Irritable bowel syndrome                  | 13,951                             | 523 (3.7)    | 269 (1.9)    | <0.001  | 3202                                  | 68 (2.1)   | 53 (1.7)   | 0.168   |
| Chronic lung disease                      | 13,951                             | 1,196 (8.6)  | 1,050 (7.5)  | 0.001   | 3,202                                 | 191 (6.0)  | 222 (6.9)  | 0.111   |

The index dates were defined as: <sup>1</sup>the first demyelinating disease related code or <sup>2</sup> the date of MS symptom onset, as recorded by the MS neurologist. <sup>3</sup> Includes depression, anxiety and bipolar disorder. <sup>4</sup> Not calculated in Nova Scotia because comprehensive prescription data are unavailable. <sup>5</sup> Not calculated in Manitoba because <6 cases were identified. <sup>6</sup> Not calculated in British Columbia because <6 cases were identified. Due to privacy regulations, and as required by the data custodians, cells with less than 6 cases cannot be reported
